# Supplementary material for: Two-dimensional structural ordering in a chromophoric ionic liquid for triplet energy migration-based photon upconversion
Source: Royal Society of Chemistry journal article supplement (doi:10.1039/c7cp06266d), 2017-11-03
Supplement: c7cp06266d1.pdf [file c7cp06266d1.pdf]

## **Supporting Information for**

### **Two-dimensional structural ordering in a chromophoric ionic liquid for triplet energy migration-based photon upconversion**

Shota Hisamitsu,<sup>a</sup> Nobuhiro Yanai,<sup>\*a,b</sup> Hironori Kouno,<sup>a</sup> Eisuke Magome,<sup>c</sup> Masaya Matsuki,<sup>a</sup> Teppei Yamada,<sup>a,b</sup> Angelo Monguzzi,<sup>d</sup> and Nobuo Kimizuka<sup>\*a</sup>

<sup>a</sup> Department of Chemistry and Biochemistry, Graduate School of Engineering, Center for Molecular Systems (CMS), Kyushu University, 744 Moto-oka, Nishi-ku, Fukuoka 819-0395 (Japan).

<sup>b</sup> JST-PRESTO, Honcho 4-1-8, Kawaguchi, Saitama 332-0012 (Japan).

<sup>c</sup> Kyushu Synchrotron Light Research Center, 8-7 Yayoigaoka, Tosu, Saga, 841-0005 (Japan).

<sup>d</sup> Dipartimento di Scienza dei Materiali, Università Milano Bicocca, via R. Cozzi 53, 20125, Milano (Italy)..

\*E-mail: yanai@mail.cstm.kyushu-u.ac.jp; n-kimi@mail.cstm.kyushu-u.ac.jp.

### Supporting Figures

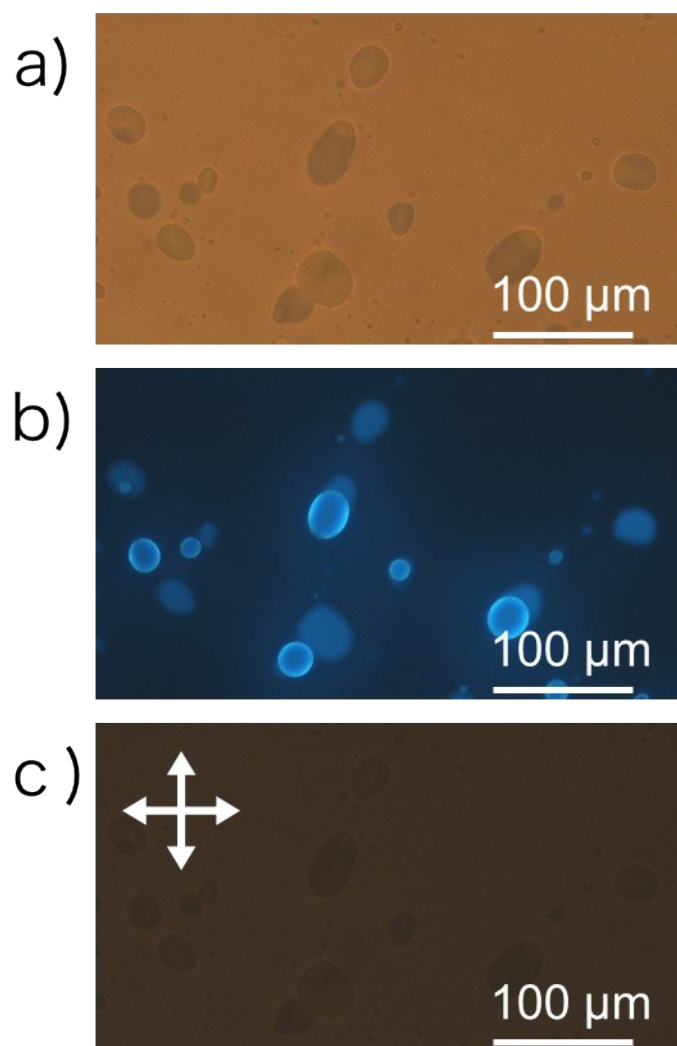

**Figure S1.** Microscopic images of glassy state of P<sub>22214</sub>DPAS at 0 °C under (a) white light and (b) UV light ( $\lambda_{\text{ex}} = 365 \text{ nm}$ ). (c) Polarized microscopic images of glassy state of P<sub>22214</sub>DPAS at 0 °C.

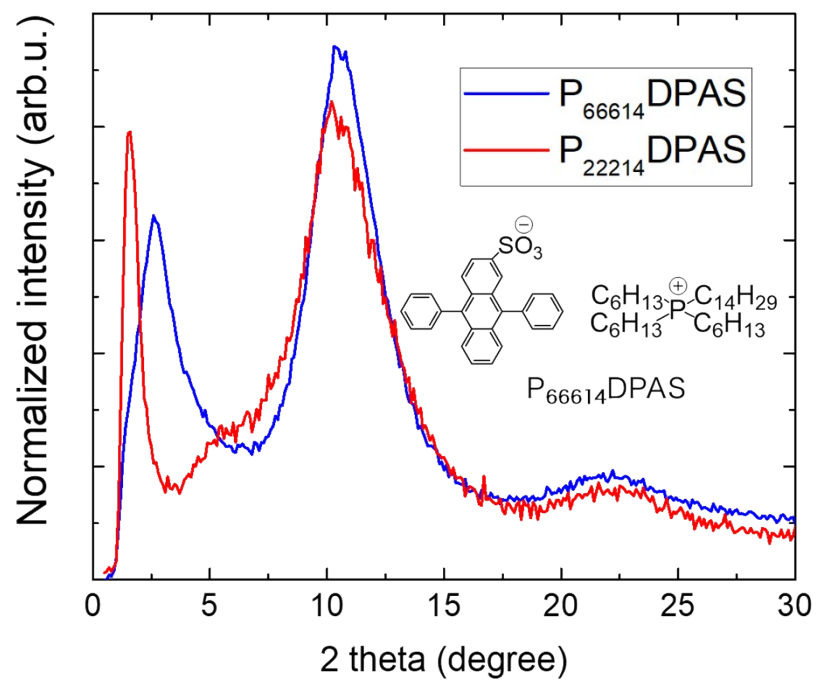

**Figure S2.** Synchrotron PXRD patterns of  $\text{P}_{66614}\text{DPAS}$  (blue) and  $\text{P}_{22214}\text{DPAS}$  (red) in the IL states. Chemical structure of  $\text{P}_{66614}\text{DPAS}$  is shown.

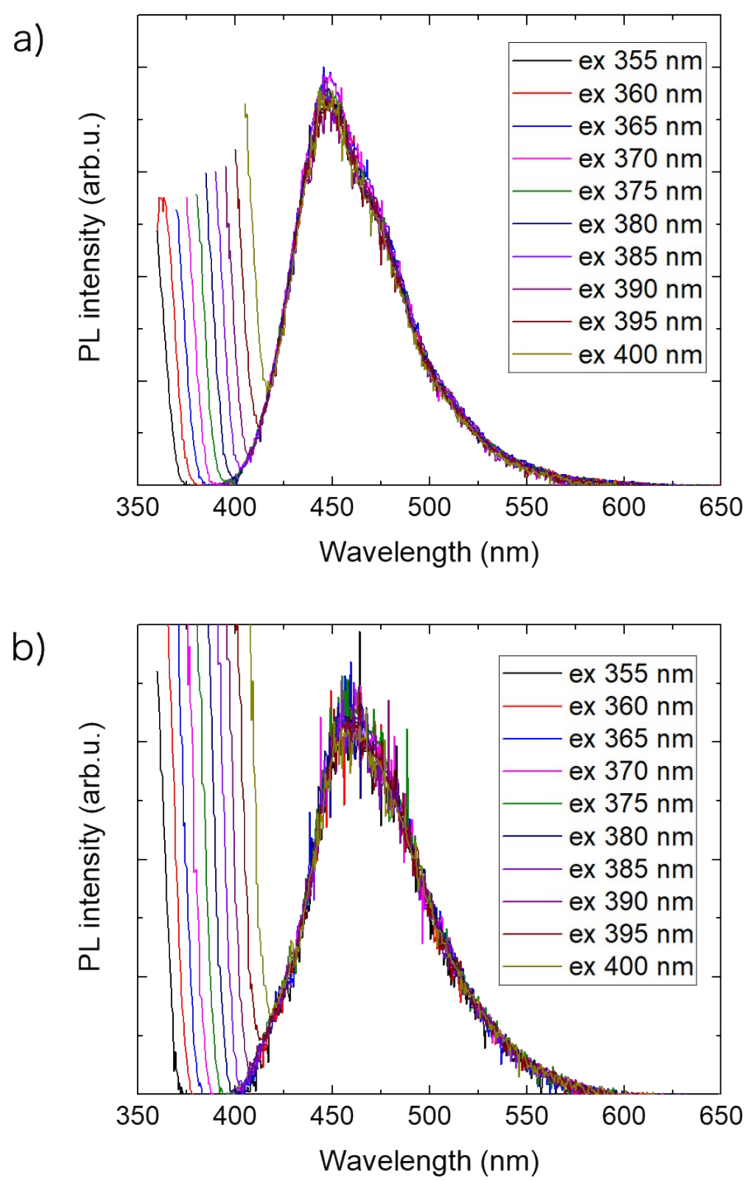

**Figure S3.** Excitation wavelength dependence of emission spectra in (a) IC state and (b) IL state.

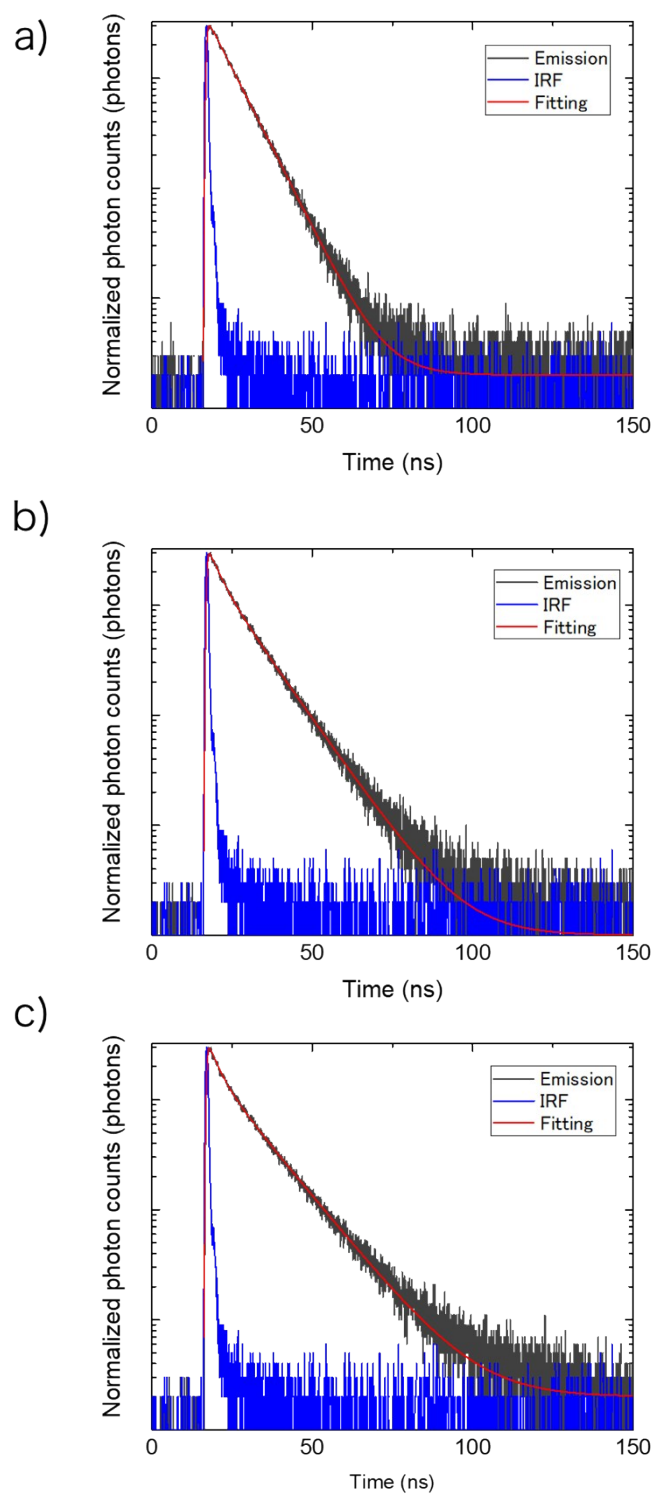

**Figure S4.** Fluorescence decays of P<sub>22214</sub>DPAS in (a) 0.01 mM methanol solution, (b) IC and (c) IL states. Excitation wavelength was 365 nm and detection wavelengths were 440 nm for solution and

450 nm for IC and IL states.

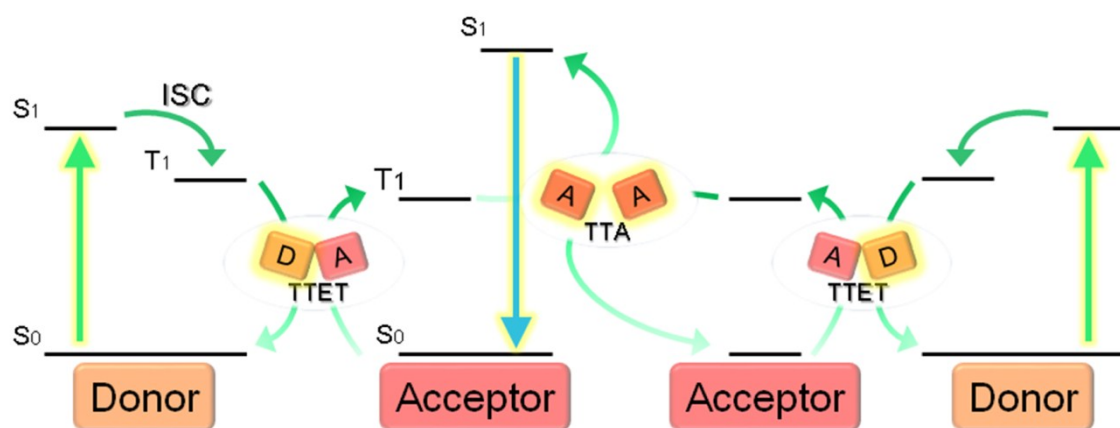

**Figure S5.** Outline of the TTA-UC process, showing the energy levels involved in the TTA-UC. The TTA-UC involves a triplet sensitizer (donor) with high intersystem crossing (ISC) efficiency and an emitter (acceptor) with high fluorescence quantum yield. First, the sensitizer absorbs the low energy light to produce the excited singlet state ( $S_1$ ). Second, the triplet state ( $T_1$ ) of the sensitizer is populated through ISC. Third, triplet-triplet energy transfer (TTET) from donor  $T_1$  to the triplet state of the acceptor takes place *via* the Dexter mechanism. Finally, the collision and annihilation (TTA) between two acceptor triplets produce a high-energy singlet excited state ( $S_1$ ) of the acceptor which radiates upconverted photons as delayed fluorescence.

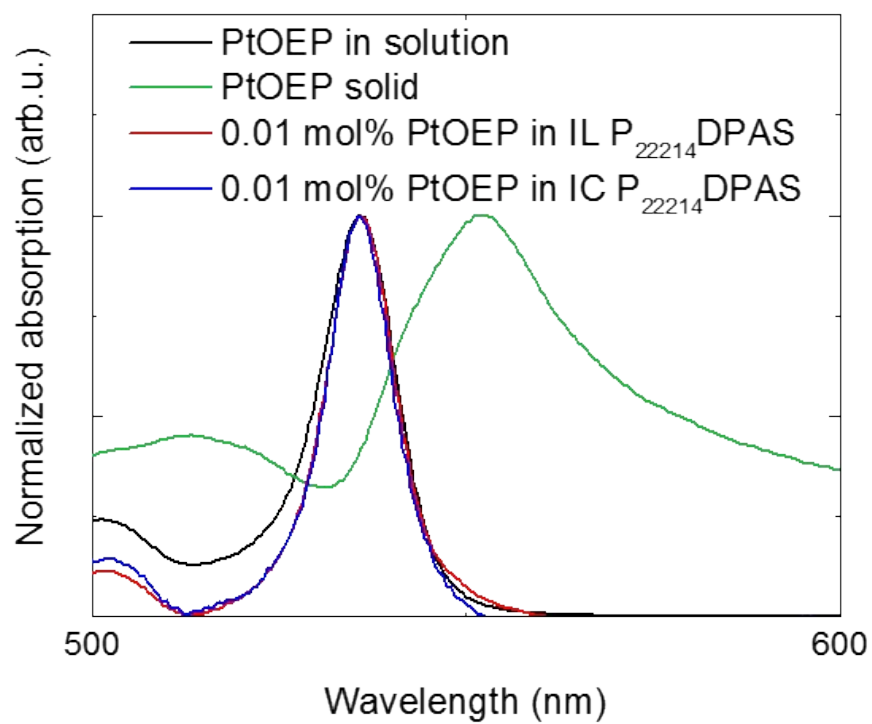

**Figure S6.** UV-vis absorption spectra of IL P<sub>22214</sub>DPAS with 0.01mol% PtOEP (red), IC P<sub>22214</sub>DPAS with 0.1mol% PtOEP (blue), chloroform solution of PtOEP (black line), and bulk solid PtOEP (green).



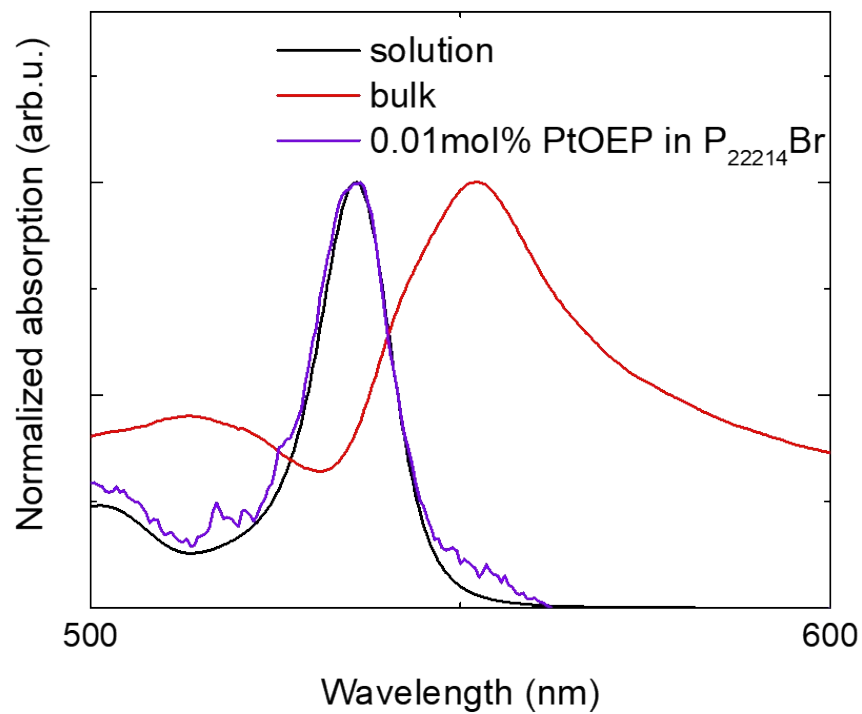

**Figure S7.** UV-vis absorption spectra of IC P<sub>22214</sub>Br with 0.01mol% PtOEP (purple), chloroform solution of PtOEP (black line), and bulk solid PtOEP (red).

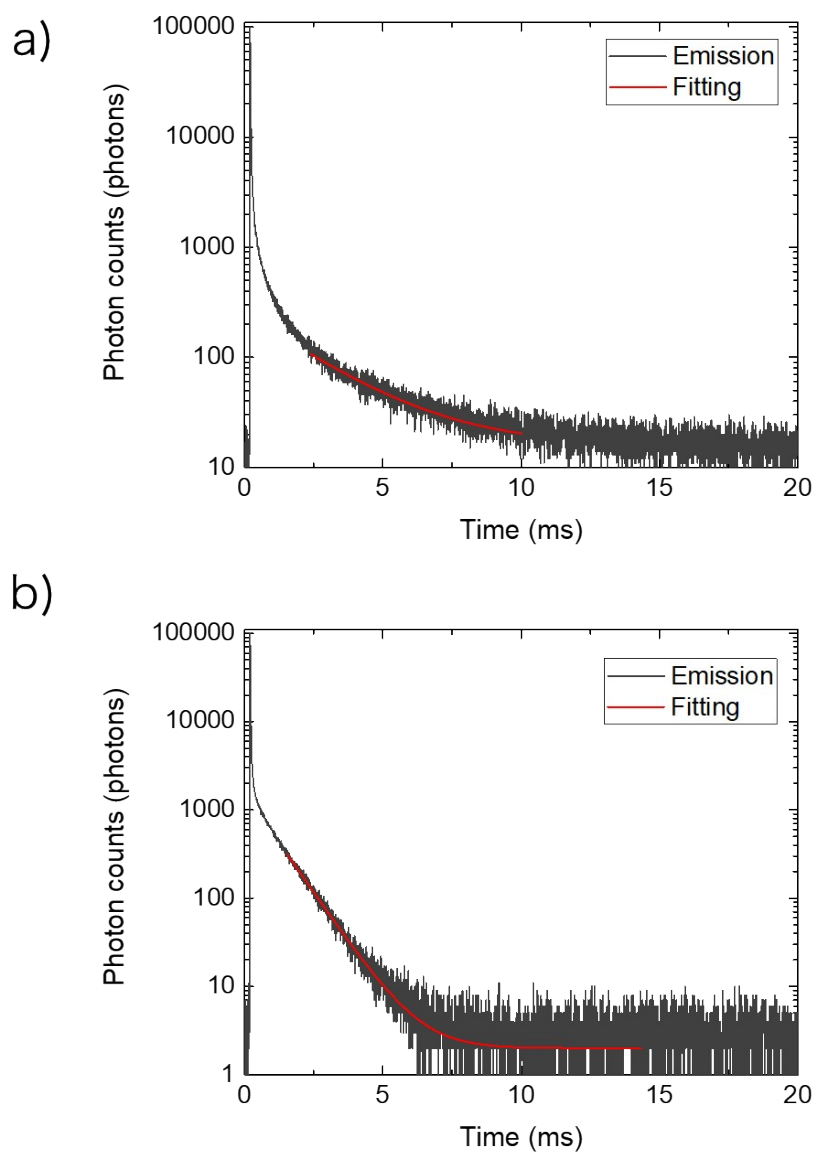

**Figure S8.** TTA-UC decays of  $P_{22214}DPAS$  in (a) IC and (b) IL states. Excitation wavelength was 531 nm and detection wavelengths were 450 nm.

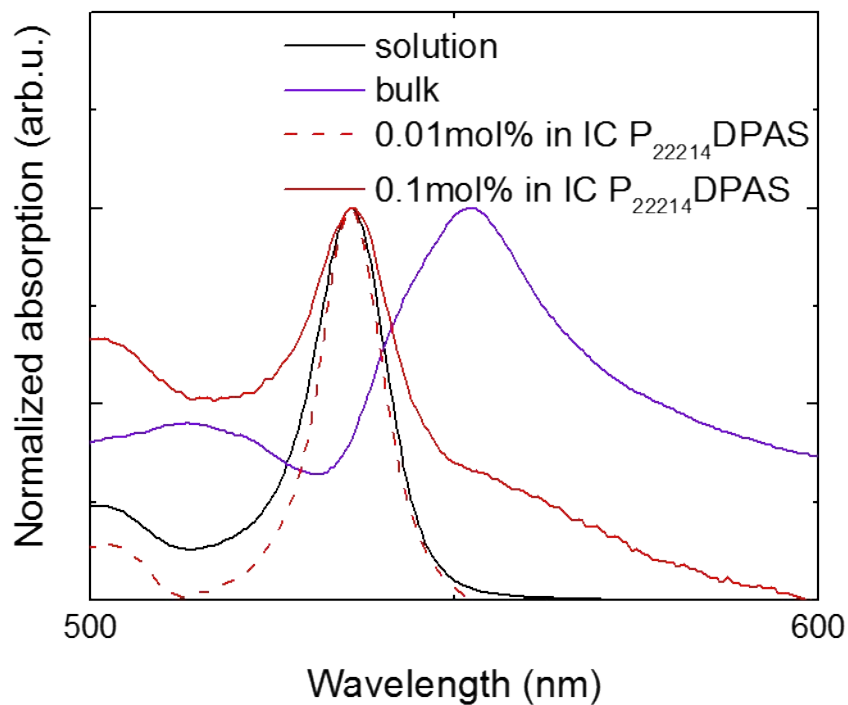

**Figure S9.** UV-vis absorption spectra of IC P<sub>22214</sub>DPAS with 0.1mol% PtOEP (red solid line), IC P<sub>22214</sub>DPAS with 0.01 mol% PtOEP (red dashed line), chloroform solution of PtOEP (black), and bulk solid PtOEP (purple).
